# Supplementary material for: Single-material organic solar cells with fully conjugated electron-donor alkoxy-substituted bithiophene units and electron-acceptor benzothiadiazole moieties alternating in the main chain
Source: Royal Society of Chemistry journal article supplement (doi:10.1039/d0tc00541j), 2020-01-01
Supplement: d0tc00541j1.pdf [file d0tc00541j1.pdf]

## Supporting Information

# Single-material organic solar cells with fully conjugated electron-donor alkoxy-substituted bithiophene units and electron-acceptor benzothiadiazole moieties alternating in the main chain

*Martina Marinelli<sup>a</sup>, Massimiliano Lanzi<sup>a</sup>, Andrea Liscio<sup>b</sup>, Alberto Zanelli<sup>c</sup>, Mattia Zangoli<sup>c</sup>,  
Francesca Di Maria<sup>c,d\*</sup>, Elisabetta Salatelli<sup>a,\*</sup>*

<sup>a</sup> Dpt. of Industrial Chemistry Toso Montanari, University of Bologna, Viale del Risorgimento 4, I-40136 Bologna, Italy

<sup>b</sup> CNR-IMM, Via del Fosso del Cavaliere 100, I-00133 Roma, Italy

<sup>c</sup> CNR-ISOF, Via P. Gobetti 101, I-40129 Bologna, Italy

<sup>d</sup> Mediteknology srl, Via P. Gobetti 101, I-40129, Bologna, Italy

\* Corresponding authors: [elisabetta.salatelli@unibo.it](mailto:elisabetta.salatelli@unibo.it) (E. Salatelli)

[francesca.dimaria@isof.cnr.it](mailto:francesca.dimaria@isof.cnr.it) (F. Di Maria)

## I. Monomers synthesis

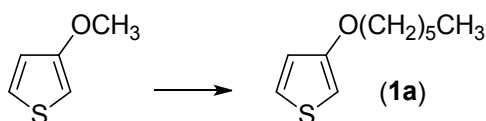

**3-Hexyloxythiophene (1a).** To a three-necked flask containing a solution of 3-methoxythiophene (2.00 g, 17.4 mmol) in 16.8 ml of toluene, 1-hexanol (4.4 ml, 34.8 mmol) and *p*-toluenesulfonic acid monohydrate (0.60 g, 2.6 mmol) were sequentially added under stirring and inert atmosphere. The mixture was heated to 120°C for 20 h. After cooling, the reaction mixture was poured into water (150 ml) and extracted with CH<sub>2</sub>Cl<sub>2</sub>. The organic phase was washed with water, dried with Na<sub>2</sub>SO<sub>4</sub> and the solvent removed by evaporation under reduced pressure. The crude product was finally purified by column chromatography on silica gel with cyclohexane/CH<sub>2</sub>Cl<sub>2</sub> 4:1 v/v as eluent to afford 2.21 g (68% yield) of **1a** as a colorless liquid. EI-MS *m/z* 184(M<sup>+</sup>).

<sup>1</sup>H NMR (400 MHz, CDCl<sub>3</sub>, TMS/ppm): δ 7.17 (dd, <sup>3</sup>*J* = 5.2 Hz, <sup>4</sup>*J* = 3.2 Hz, 1H), 6.78 (dd, <sup>3</sup>*J* = 5.2 Hz, <sup>4</sup>*J* = 1.6 Hz, 1H), 6.22 (dd, <sup>3</sup>*J* = 3.2 Hz, <sup>4</sup>*J* = 1.6 Hz, 1H), 3.95 (t, 2H), 1.83-1.73 (m, 2H), 1.50-1.29 (m, 6H), 0.92 (t, 3H); <sup>13</sup>C NMR (100 MHz, CDCl<sub>3</sub>): 158.1, 124.5, 119.5, 96.9, 70.3, 31.6, 29.2, 25.7, 22.6, 14.0.

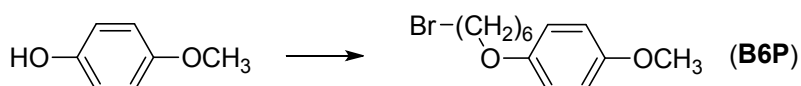

**1-Bromo-6-(*p*-methoxy)phenoxyhexane (B6P).** A solution of KOH (32.32 g, 0.58 mol) and *p*-methoxyphenol (49.46 g, 0.40 mol) in methanol (80 ml) was added in 90 min to a solution of 1,6-dibromohexane (200.0 g, 0.82 mol) in acetone (160 ml) and then heated at reflux under stirring for 1 h. After cooling to room temperature and removal of solid KBr by filtration, the solvent was evaporated under reduced pressure and the crude product was dissolved in Et<sub>2</sub>O (100 ml), washed with NaOH 2% wt. and then with water. After drying on Na<sub>2</sub>SO<sub>4</sub> and solvent evaporation at reduced pressure, the crude product was purified by fractional vacuum distillation (b.p. 52°-54°C at 0.5 mbar) in order to eliminate the excess of B6B to give 89.56 g (78% yield) of **B6P** as a white solid. EI-MS *m/z* 286(M<sup>+</sup>).

<sup>1</sup>H-NMR (400 MHz, CDCl<sub>3</sub>, TMS/ppm): δ 6.83 (s, 4H, aryl), 3.91 (t, 2H), 3.77 (s, 3H), 3.42 (t, 2H), 1.89 (m, 2H), 1.77 (m, 2H), 1.53-1.46 (m, 4H).

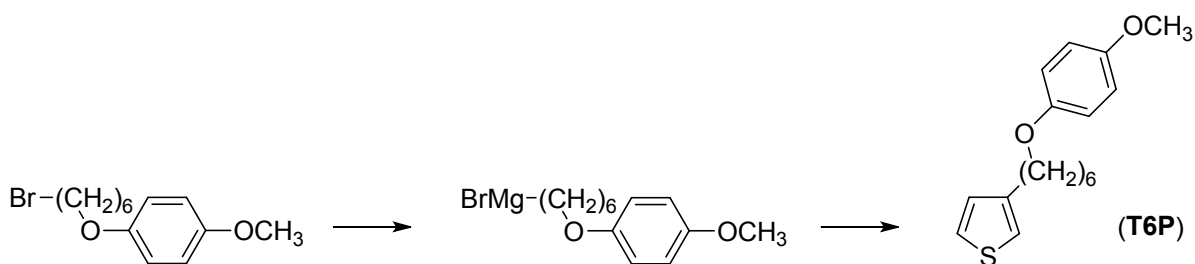

**3-[6-(*p*-Methoxy)phenoxy]hexylthiophene (T6P).** To a three-necked flask, containing B6P (20.0 g, 0.07 mol) and Mg turnings (1.75 g, 0.07 mol), anh. Et<sub>2</sub>O (150 ml) was added under nitrogen atmosphere and stirring. The reaction mixture was then heated to 35°C for 5 h. The so obtained

Grignard derivative of B6P was subsequently dropped via cannula to a second flask containing a suspension of 3-bromothiophene (9.62 g, 0.06 mol) and Ni(dppp)Cl<sub>2</sub> (0.056 g, 0.10 mmol) at -5/-8°C. The mixture was heated under reflux for 16 h and then poured into aq. HCl 2% (200 ml) followed by extraction with Et<sub>2</sub>O. The organic phase was washed with water, dried on Na<sub>2</sub>SO<sub>4</sub> and the solvent removed by evaporation under reduced pressure. The crude product was finally purified by crystallization from ligroin, followed by column chromatography on silica gel with hexane/Et<sub>2</sub>O 97:3 v/v as eluent to obtain 8.49 g (42% yield) of **T6P** as a white solid. EI-MS m/z 290(M<sup>+</sup>).

<sup>1</sup>H-NMR (400 MHz, CDCl<sub>3</sub>, TMS/ppm): δ 7.24-7.22 (m, 1H), 6.94-6.90 (m, 2H), 6.82 (s, 4H), 3.90 (t, 2H), 3.76 (s, 3H), 2.64 (t, 2H), 1.82-1.70 (m, 2H), 1.70-1.58 (m, 2H), 1.54-1.38 (m, 4H).

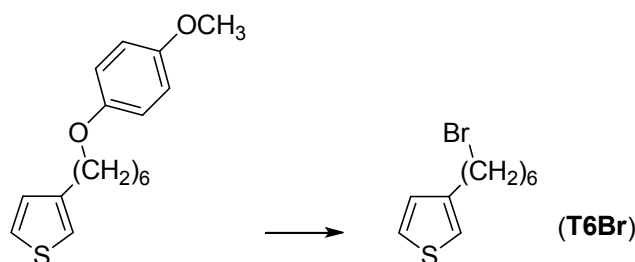

**3-(6-Bromohexyl)thiophene (T6Br)**. A mixture of acetic anhydride (19.5 ml, 0.21 mol) and aq. HBr (48% wt.) (14.1 ml, 0.12 mol) was added to T6P (6.00 g, 0.021 mol) and the reaction mixture heated at 90°C for 24 h. After cooling and dilution with water, the mixture was extracted with petroleum ether, then washed with saturated aq. NaHCO<sub>3</sub> and finally with water to neutrality. After drying on Na<sub>2</sub>SO<sub>4</sub> and solvent evaporation at reduced pressure, the crude product was purified by column chromatography on silica gel with cyclohexane as eluent to afford 3.92 g (77% yield) of **T6Br** as a colorless oil. EI-MS m/z 246(M<sup>+</sup>).

<sup>1</sup>H-NMR (400 MHz, CDCl<sub>3</sub>, TMS/ppm): δ 7.24-7.22 (m, 1H, 5-H), 6.94-6.90 (m, 2H), 3.40 (t, 2H), 2.63 (t, 2H), 1.90-1.82 (m, 2H), 1.68-1.60 (m, 2H), 1.50-1.32 (m, 4H).

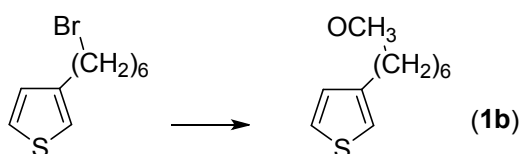

**3-(6-Methoxyhexyl)thiophene (1b)**. A 0.3 M solution of T6Br (3.83 g, 0.016 mol) in anhydrous MeOH (52 ml) was added to 16.4 ml of MeONa in MeOH (30% wt) under stirring and nitrogen atmosphere. The reaction mixture was refluxed for 4 h, then poured into water and extracted with Et<sub>2</sub>O. The ethereal solution was dried on Na<sub>2</sub>SO<sub>4</sub> and evaporated at reduced pressure obtaining 2.78 g (90% yield) of **1b** as a colorless liquid. EI-MS m/z 198(M<sup>+</sup>).

<sup>1</sup>H-NMR (400 MHz, CDCl<sub>3</sub>, TMS/ppm): δ 7.24-7.22 (m, 1H), 6.94-6.90 (m, 2H), 3.36 (t, 2H), 3.33 (s, 3H), 2.63 (t, 2H), 1.68-1.54 (m, 4H), 1.42-1.32 (m, 4H); <sup>13</sup>C NMR (100 MHz, CDCl<sub>3</sub>): 143.1, 128.2, 125.1, 119.8, 72.8, 58.5, 30.5, 30.2, 29.6, 29.1, 26.0.

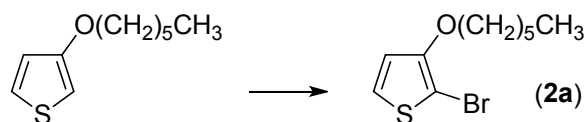

**2-Bromo-3-hexyloxythiophene (2a).** N-Bromosuccinimide (NBS) (386 mg, 2.2 mmol) dissolved in 3 ml of N,N-dimethylformamide (DMF) was added in 1h to a solution of 3-hexyloxythiophene (**1a**) (400 mg, 2.2 mmol) in 3 ml of DMF at 0°C, under stirring and protection from light. The mixture was stirred for 24h at room temperature in the dark and then poured into water (50 ml) and extracted with Et<sub>2</sub>O. After drying on Na<sub>2</sub>SO<sub>4</sub> and solvent evaporation at reduced pressure, the crude product was purified by column chromatography on silica gel with cyclohexane/ethyl acetate 19:1 v/v as eluent to afford 560 mg (98% yield) of **2a** as a yellowish liquid. EI-MS m/z 264(M<sup>+</sup>). *Caution! The product appears to be unstable, undergoing exothermic autopolymerization if stored in the absence of solvent even in the cold.*

<sup>1</sup>H-NMR (400 MHz, CDCl<sub>3</sub>, TMS/ppm): δ 7.18 (d, <sup>3</sup>J = 4 Hz, 1H), 6.78 (d, <sup>3</sup>J = 4 Hz, 1H), 4.03 (t, 2H), 1.79-1.71 (m, 2H), 1.50-1.32 (m, 6H), 0.91 (t, 3H); <sup>13</sup>C NMR (100 MHz, CDCl<sub>3</sub>): δ 154.6, 124.1, 117.5, 91.6, 72.2, 31.5, 29.5, 25.5, 22.6, 14.0.

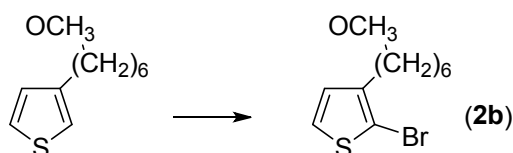

**2-Bromo-3-(6-methoxyhexyl)thiophene (2b).** The same procedure described for **2a** was followed starting from 3-(6-methoxyhexyl)thiophene (**1b**) (262 mg, 1.32 mmol) and NBS (235 mg, 1.32 mmol) in DMF obtaining 325 mg (89% yield) of pure **2b** as a yellowish oil, without need of chromatographic purification. EI-MS m/z 276(M<sup>+</sup>).

<sup>1</sup>H-NMR (500 MHz, CDCl<sub>3</sub>, TMS/ppm): δ 7.17 (d, <sup>3</sup>J = 4 Hz, 1H), 6.78 (d, <sup>3</sup>J = 4 Hz, 1H), 3.34 (t, 2H), 3.33 (s, 3H), 2.56 (t, 2H), 1.64-1.54 (m, 4H), 1.41-1.30 (m, 4H); <sup>13</sup>C NMR (100 MHz, CDCl<sub>3</sub>): 141.8, 128.2, 125.2, 108.8, 72.8, 58.2, 29.7, 29.6, 29.3, 29.0, 25.9.

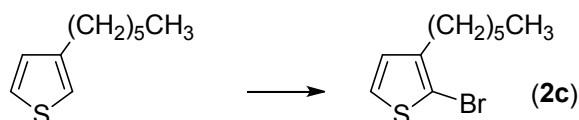

**2-Bromo-3-hexylthiophene (2c).** The same procedure described for **2a** was followed starting from 3-hexylthiophene (1.00 g, 0.006 mol) in 7 ml of DMF and NBS (1.06 g, 0.006 mol) dissolved in 7 ml of DMF. The crude product was purified by column chromatography on silica gel with cyclohexane as eluent to obtain 1.21 g (77% yield) of **2c** as a colorless liquid. EI-MS m/z 246(M<sup>+</sup>).

<sup>1</sup>H-NMR (400 MHz, CDCl<sub>3</sub>, TMS/ppm): δ 7.20 (d, <sup>3</sup>J = 4 Hz, 1H), 6.82 (d, <sup>3</sup>J = 4 Hz, 1H), 2.60 (t, 2H), 1.69-1.54 (m, 2H), 1.43-1.26 (m, 6H), 0.94 (t, 3H); <sup>13</sup>C NMR (100 MHz, CDCl<sub>3</sub>): 142.0, 128.2, 125.1, 108.8, 31.7, 29.7, 29.4, 29.0, 22.6, 14.1.

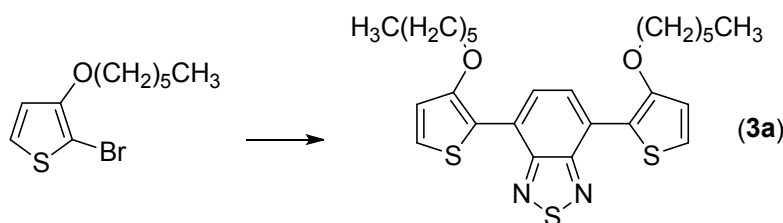

*4,7-Bis(3-hexyloxythiophen-2-yl)benzo[c][2,1,3]thiadiazole (3a)*. A mixture of 2-bromo-3-hexyloxythiophene (120 mg, 0.46 mmol), 2,1,3-benzothiadiazole-4,7-bis(boronic acid pinacol ester) (106 mg, 0.27 mmol), PdCl<sub>2</sub>dppf (19mg, 5% mol), NaHCO<sub>3</sub> (115 mg, 1.37mmol) in THF/water 2:1 v/v (4.5 ml) was kept under MW irradiation at 80°C for 30 min. The reaction mixture was cooled to room temperature and poured into water (100 ml), extracted with CH<sub>2</sub>Cl<sub>2</sub> and finally washed with water. After drying (Na<sub>2</sub>SO<sub>4</sub>) and solvent evaporation at reduced pressure, the crude product was purified by flash chromatography with increasing amounts of CH<sub>2</sub>Cl<sub>2</sub> in cyclohexane as eluent (85:15 v/v) to afford 106 mg (0.21 mmol, 56% yield) of **3a** as a dark red oil. EI-MS m/z 500(M<sup>+</sup>).

<sup>1</sup>H-NMR (400 MHz, CDCl<sub>3</sub>, TMS/ppm): δ 8.48 (s, 2H), 7.37 (d, <sup>3</sup>J = 4 Hz, 2H), 6.98 (d, <sup>3</sup>J = 4 Hz, 2H), 4.15 (t, 4H), 1.89-1.79 (m, 4H), 1.54-1.32 (m, 12H), 0.91 (t, 6H); <sup>13</sup>C NMR (100 MHz, CDCl<sub>3</sub>): 155.8, 152.8, 127.1, 125.7, 124.1, 116.6, 115.9, 71.8, 31.5, 29.6, 25.8, 22.6, 14.0.

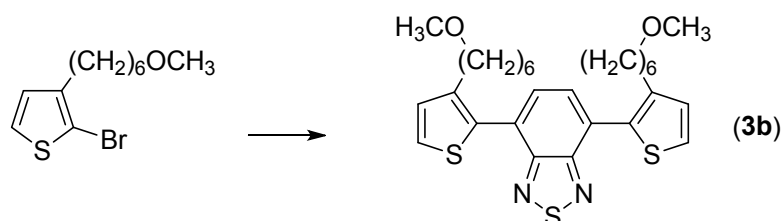

*4,7-Bis[3-(6-methoxyhexyl)thiophen-2-yl]benzo[c][2,1,3]thiadiazole (3b)*. The same procedure described for **3c** was followed starting from 2-bromo-3-(6-methoxyhexyl)thiophene (300 mg, 1.08 mmol) and 2,1,3-benzothiadiazole-4,7-bis(boronic acid pinacol ester) (168 mg, 0.43 mmol) in toluene (6 ml). The crude product was purified by column chromatography on silica gel with cyclohexane/ethyl acetate 10:2 v/v as eluent to obtain 297 mg (0.56 mmol, 52% yield) of **3c** as a fluorescent orange oil. EI-MS m/z 528(M<sup>+</sup>).

<sup>1</sup>H-NMR (500 MHz, CDCl<sub>3</sub>, TMS/ppm): δ 7.64 (s, 2H), 7.44 (d, <sup>3</sup>J = 4 Hz, 2H), 7.10 (d, <sup>3</sup>J = 4 Hz, 2H), 3.32- 3.26 (m, 10H), 2.67 (t, 4H), 1.68-1.58 (m, 4H), 1.52-1.42 (m, 4H), 1.32-1.20 (m, 8H); <sup>13</sup>C NMR (125 MHz, CDCl<sub>3</sub>): 154.3, 141.5, 132.2, 129.9, 129.1, 127.4, 125.9, 72.8, 58.5, 30.6, 29.7, 29.5, 29.4, 25.9.

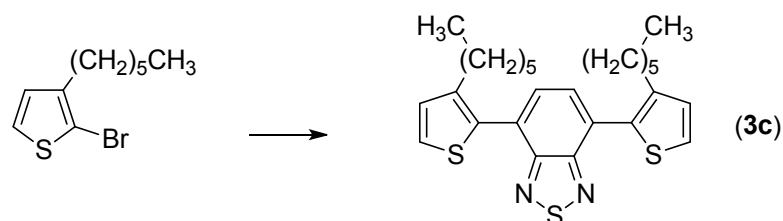

*4,7-Bis(3-hexylthiophen-2-yl)benzo[c][2,1,3]thiadiazole (3c)*. To a solution of 2-bromo-3-hexylthiophene (250 mg, 1.01 mmol) in 6.0 ml of degassed toluene, 2,1,3-benzo[c]thiadiazole-4,7-

bis(boronic acid pinacol ester) (157 mg, 0.40 mmol) was added, followed by the sequential addition of Pd(PPh<sub>3</sub>)<sub>4</sub> (82 mg, 7% mol) and aq. 2M K<sub>2</sub>CO<sub>3</sub> (5 ml), at room temperature under N<sub>2</sub> atmosphere. The mixture was vigorously stirred and degassed for 30 min and then heated under reflux (110°C) for 24h. After cooling, the mixture was treated with toluene and water, the organic layer dried on Na<sub>2</sub>SO<sub>4</sub> and the solvent evaporated at reduced pressure. The crude product was finally purified by column chromatography on silica gel with increasing amounts of CH<sub>2</sub>Cl<sub>2</sub> in cyclohexane as eluent (85:15 v/v) to afford 255 mg (0.54 mmol, 54% yield) of **3c** as a fluorescent yellow oil. EI-MS m/z 468(M<sup>+</sup>).

<sup>1</sup>H-NMR (400 MHz, CDCl<sub>3</sub>, TMS/ppm): δ 7.65 (s, 2H), 7.44 (d, <sup>3</sup>J = 4 Hz, 2H), 7.11 (d, <sup>3</sup>J = 4 Hz, 2H), 2.66 (t, 4H), 1.66-1.56 (m, 4H), 1.29-1.12 (m, 12H), 0.82 (t, 6H); <sup>13</sup>C NMR (100 MHz, CDCl<sub>3</sub>): 154.3, 141.7, 132.2, 129.9, 129.2, 127.5, 125.9, 31.6, 30.7, 29.4, 29.1, 22.6, 14.0.

## II. Polymers synthesis

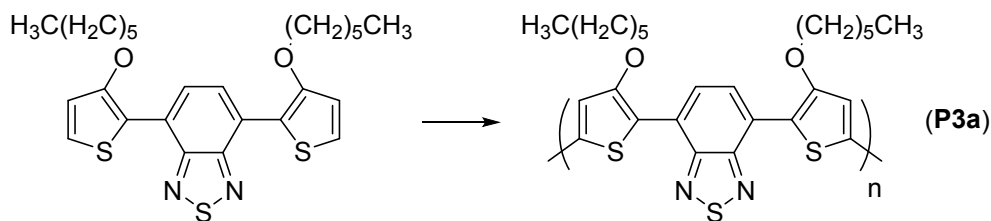

*Poly[4,7-bis(3-hexyloxythiophen-2-yl)benzo[c][2,1,3]thiadiazole]* (**P3a**). To a three-necked flask containing a suspension of FeCl<sub>3</sub> (137 mg, 0.85 mmol) in anh. CHCl<sub>3</sub> (5 ml), a solution of **3a** (106mg, 0.21mmol) in anh. CHCl<sub>3</sub> (5 ml) was slowly added (20 min) under inert atmosphere at room temperature. The mixture was left under stirring for 24 h, turning from greenish to dark blue/black color. Then, 50 ml of THF and 100 ml of CHCl<sub>3</sub> were added and the mixture washed with 2% aq. HCl up to exhaustive extraction of iron (III) ion (negative essay with NH<sub>4</sub>SCN). The organic phase was washed with water to neutrality, dried (Na<sub>2</sub>SO<sub>4</sub>) and concentrated to small volume. The crude product was finally treated with MeOH to give 0.102 g (0.21 mmol, 98% yield) of **P3a** as a dark blue solid.

<sup>1</sup>H-NMR (400 MHz, CDCl<sub>3</sub>, TMS/ppm): δ 8.55 (m) 7.00 (m), 4.25 (m), 1.90 (m), 1.64-1.18 (m), 0.97 (m).

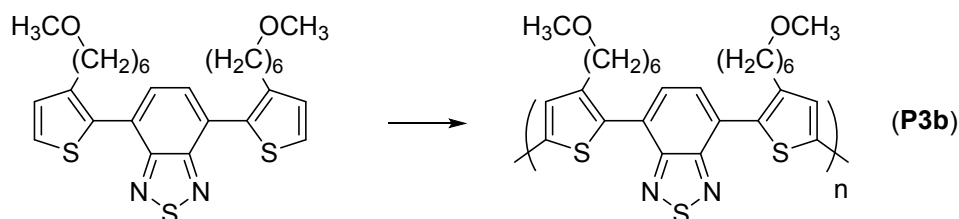

*Poly[4,7-bis[3-(6-methoxyhexyl)thiophen-2-yl]benzo[c][2,1,3]thiadiazole]* (**P3b**). The same procedure described for **P3a** was followed starting from FeCl<sub>3</sub> (147 mg, 0.91 mmol) and **3b** (120 mg, 0.23 mmol) to give 96 mg (0.18 mmol, 79% yield) of **P3b** as a purple/black solid.

<sup>1</sup>H-NMR (400 MHz, CDCl<sub>3</sub>, TMS/ppm): δ 7.71 (m), 6.98 (s), 3.31 (m), 2.72 (m), 1.72 (m), 1.52 (m), 1.46-1.22 (m).

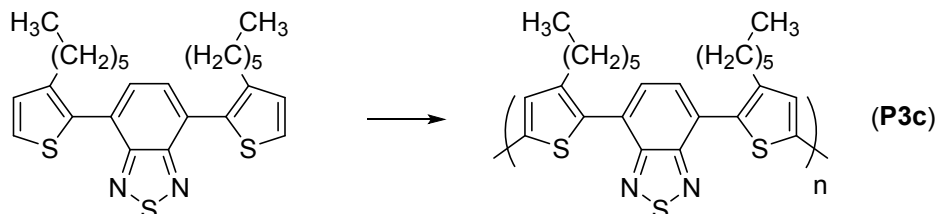

*Poly[4,7-bis(3-hexylthiophen-2-yl)benzo[c][2,1,3]thiadiazole]* (**P3c**). The same procedure described for **P3a** was followed starting from FeCl<sub>3</sub> (138 mg, 0.85 mmol) in anh. CHCl<sub>3</sub> (5 ml) and **3c** (100 mg, 0.21 mmol) in anh. CHCl<sub>3</sub> (5 ml) to give 52 mg (0.11 mmol, 54% yield) of **P3c** as a dark red solid.

<sup>1</sup>H-NMR (400 MHz, CDCl<sub>3</sub>, TMS/ppm): δ 7.65 (s), 6.92 (s), 2.64 (m), 1.70-1.06 (m), 0.90-0.84 (m).

### III. $^1\text{H-NMR}$ and $^{13}\text{C-NMR}$ spectra

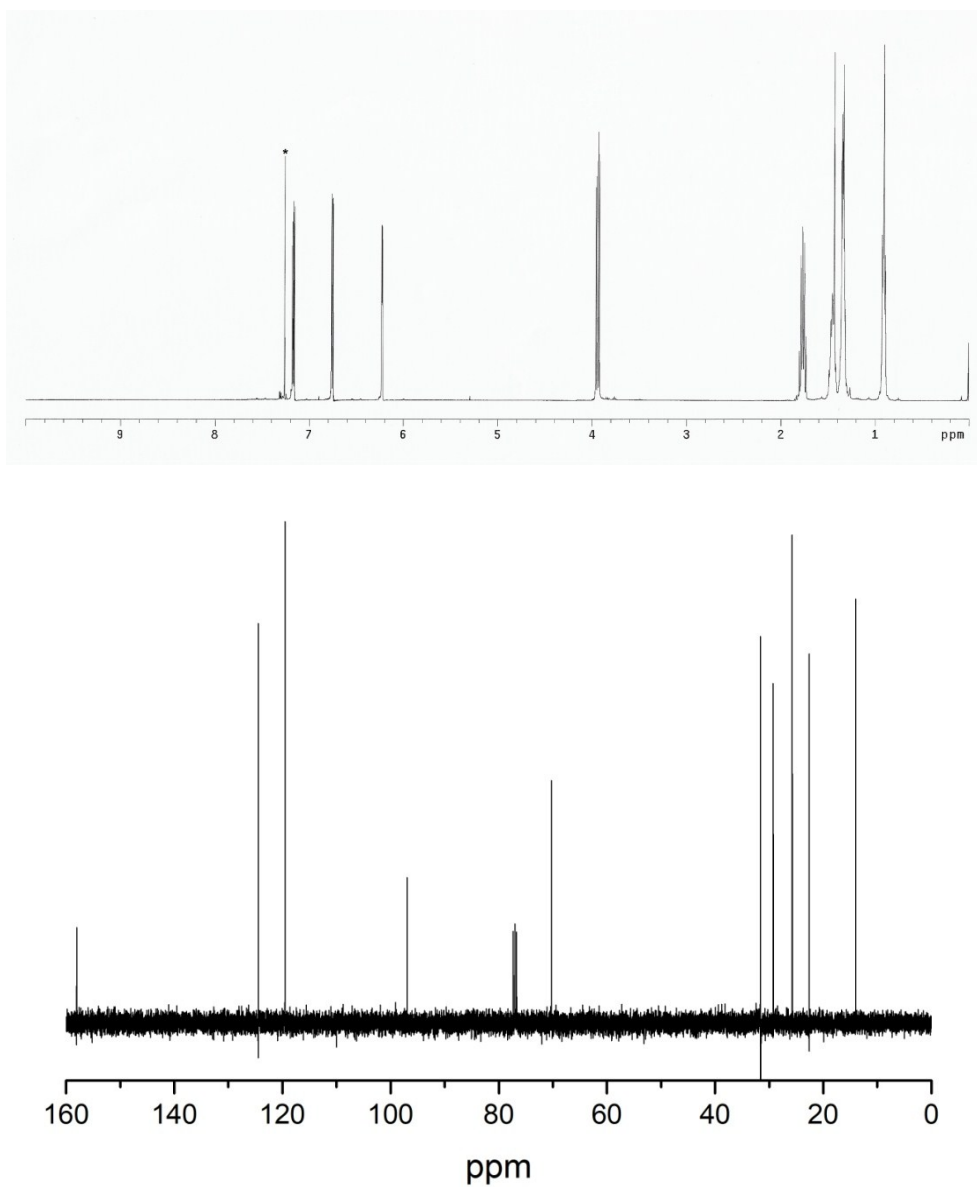

**Figure S1.**  $^1\text{H-NMR}$  and  $^{13}\text{C-NMR}$  spectra in  $\text{CDCl}_3$  of **1a**.



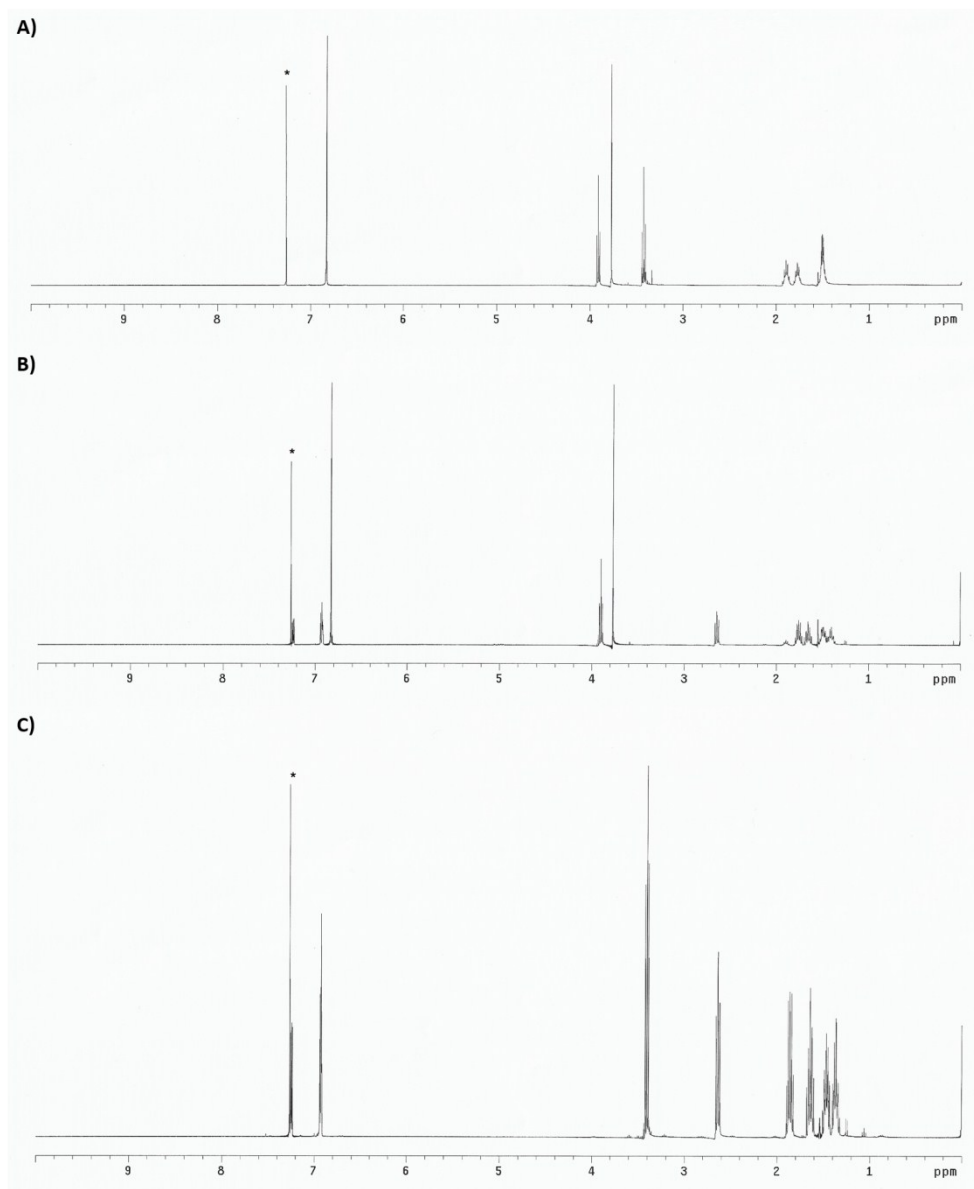

**Figure S2.** <sup>1</sup>H-NMR spectra in CDCl<sub>3</sub> of **B6P** (A), **T6P** (B) and **T6Br** (C).

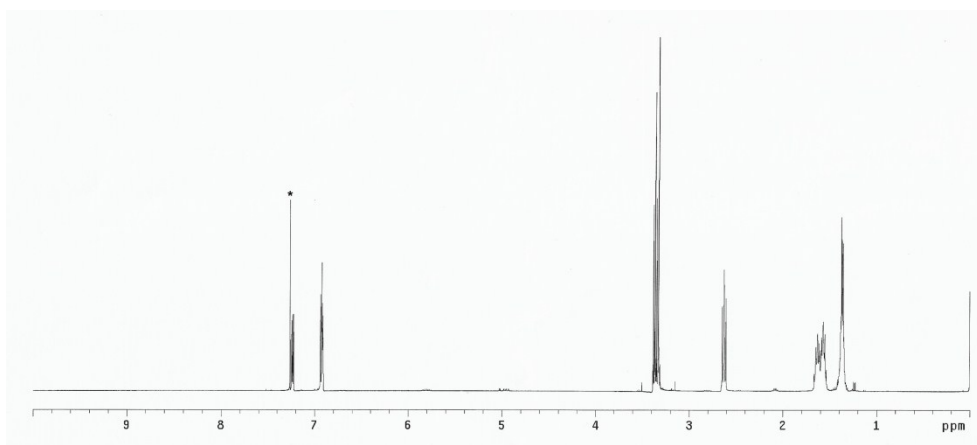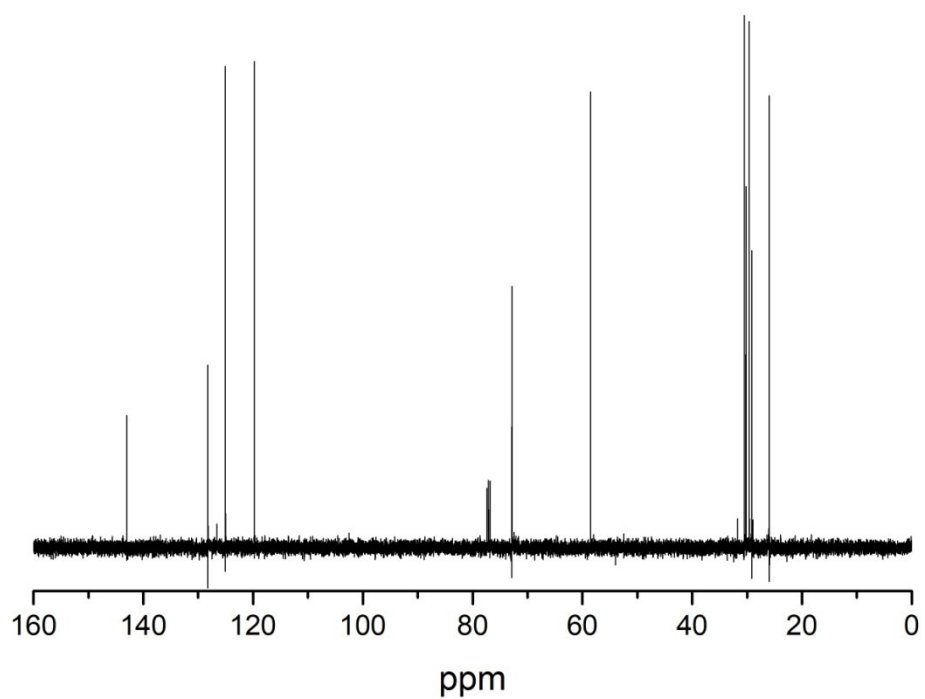

**Figure S3.**  $^1\text{H}$ -NMR and  $^{13}\text{C}$ -NMR spectra in  $\text{CDCl}_3$  of **1b**.

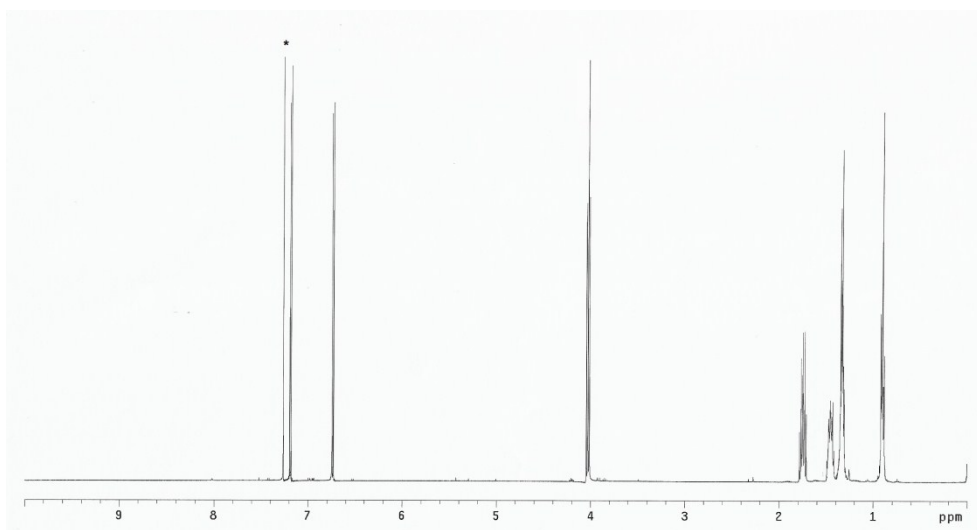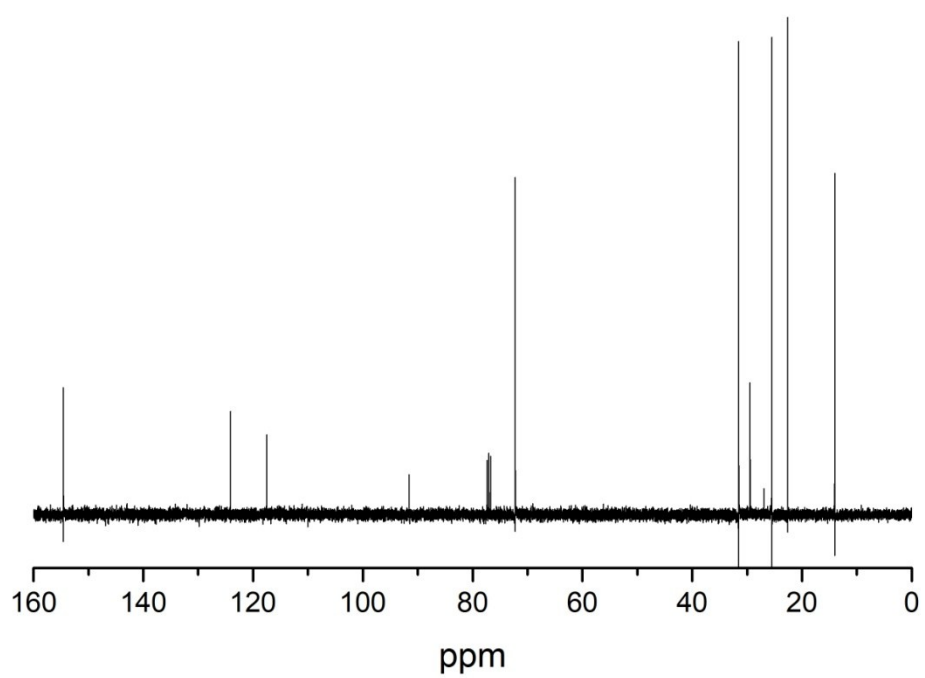

**Figure S4.**  $^1\text{H}$ -NMR and  $^{13}\text{C}$ -NMR spectra in  $\text{CDCl}_3$  of **2a**.

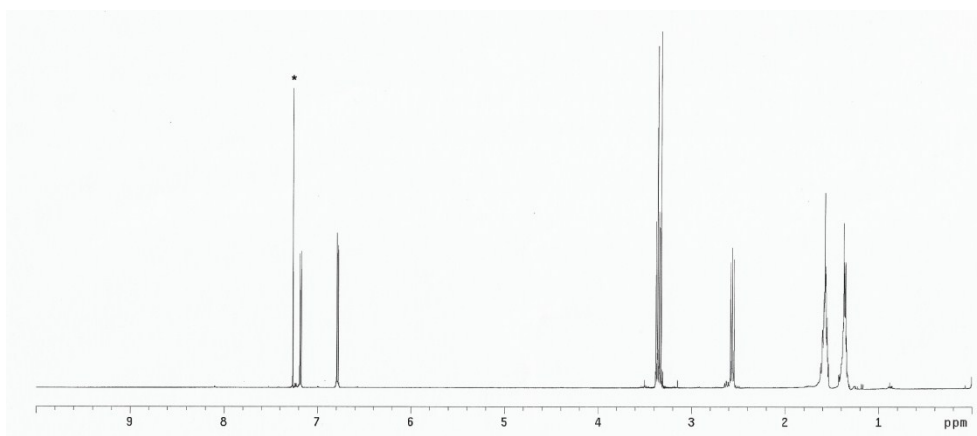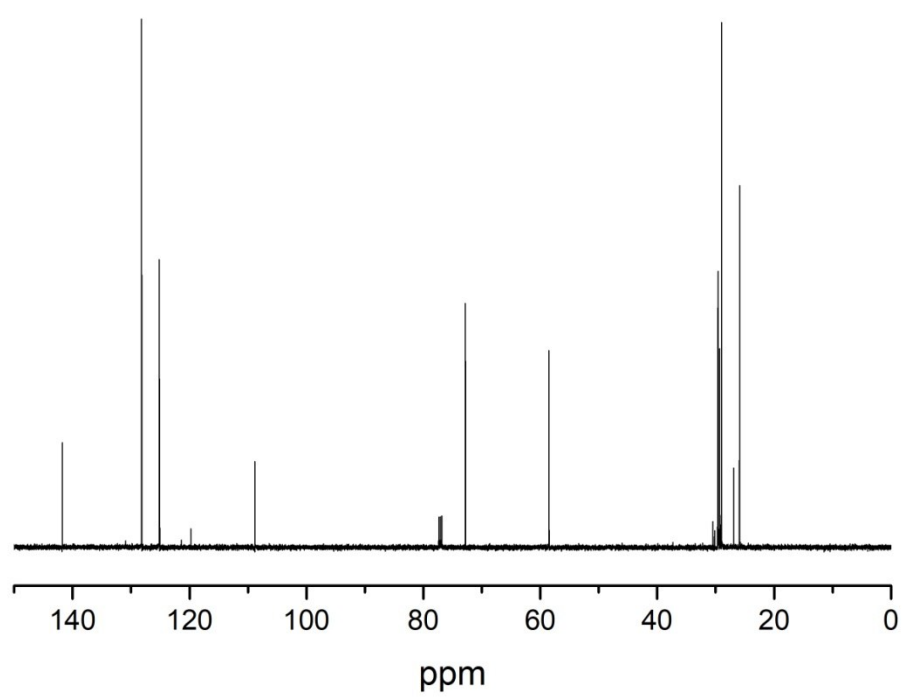

**Figure S5.**  $^1\text{H}$ -NMR and  $^{13}\text{C}$ -NMR spectra in  $\text{CDCl}_3$  of **2b**.

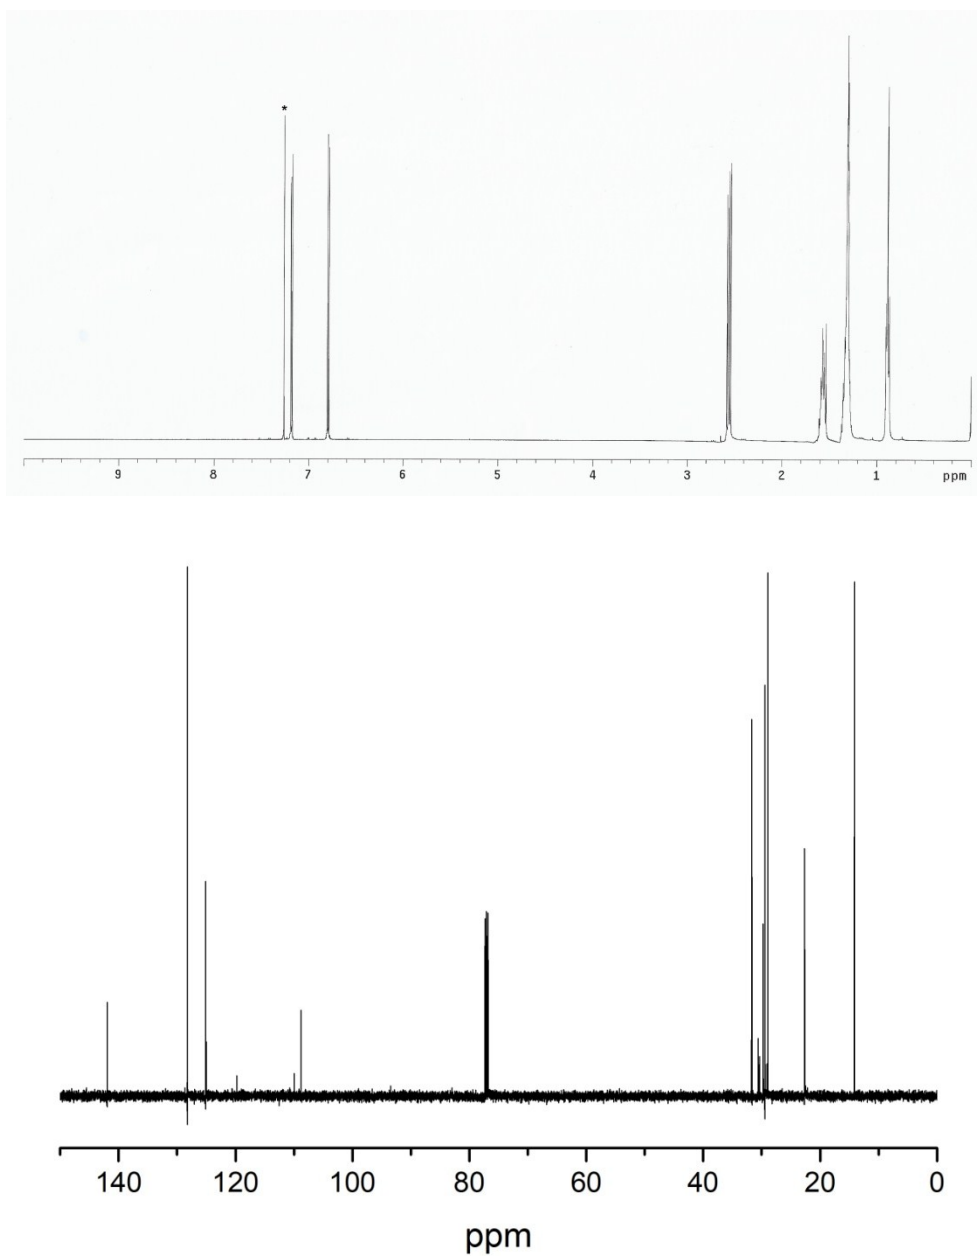

**Figure S6.** <sup>1</sup>H-NMR and <sup>13</sup>C-NMR spectra in CDCl<sub>3</sub> of **2c**.

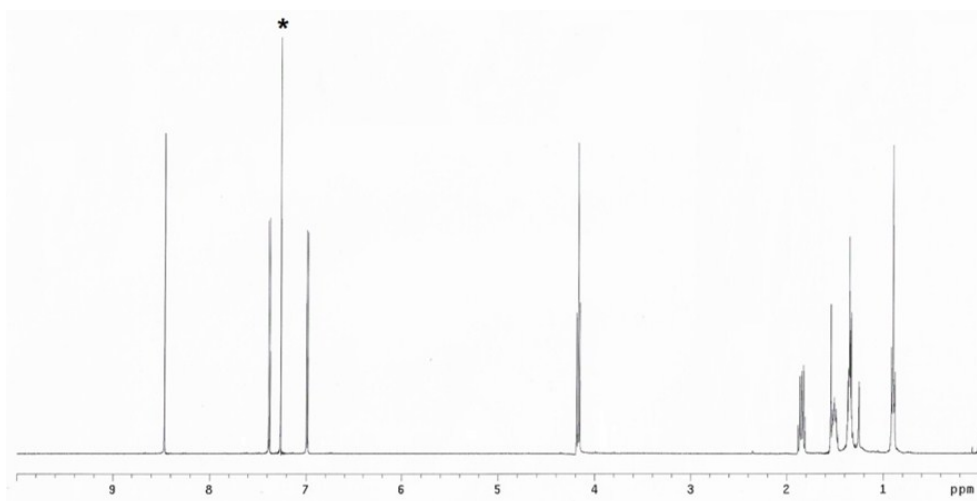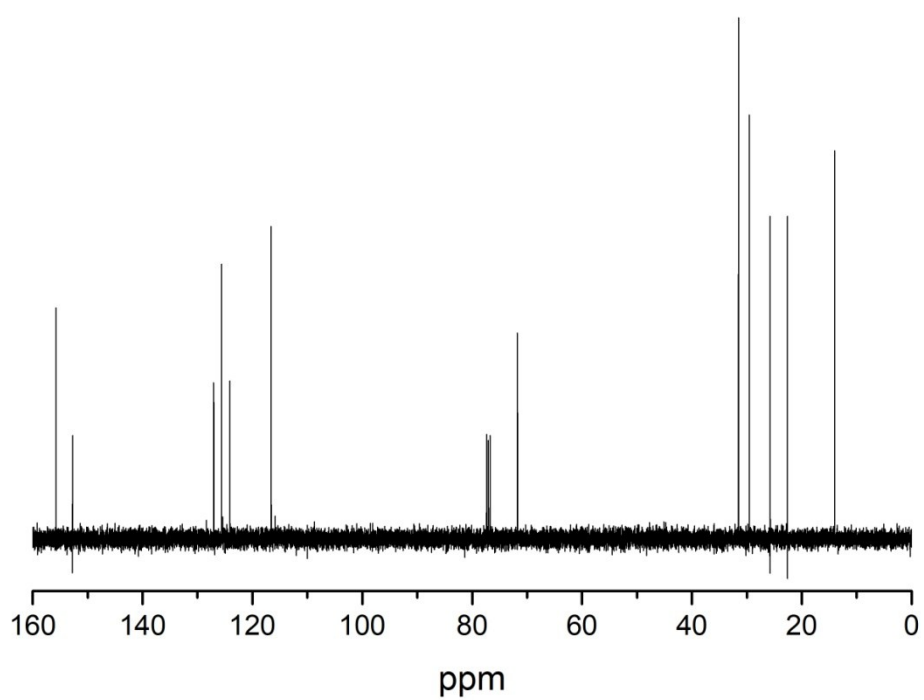

**Figure S7.**  $^1\text{H}$ -NMR and  $^{13}\text{C}$ -NMR spectra in  $\text{CDCl}_3$  of **3a**.

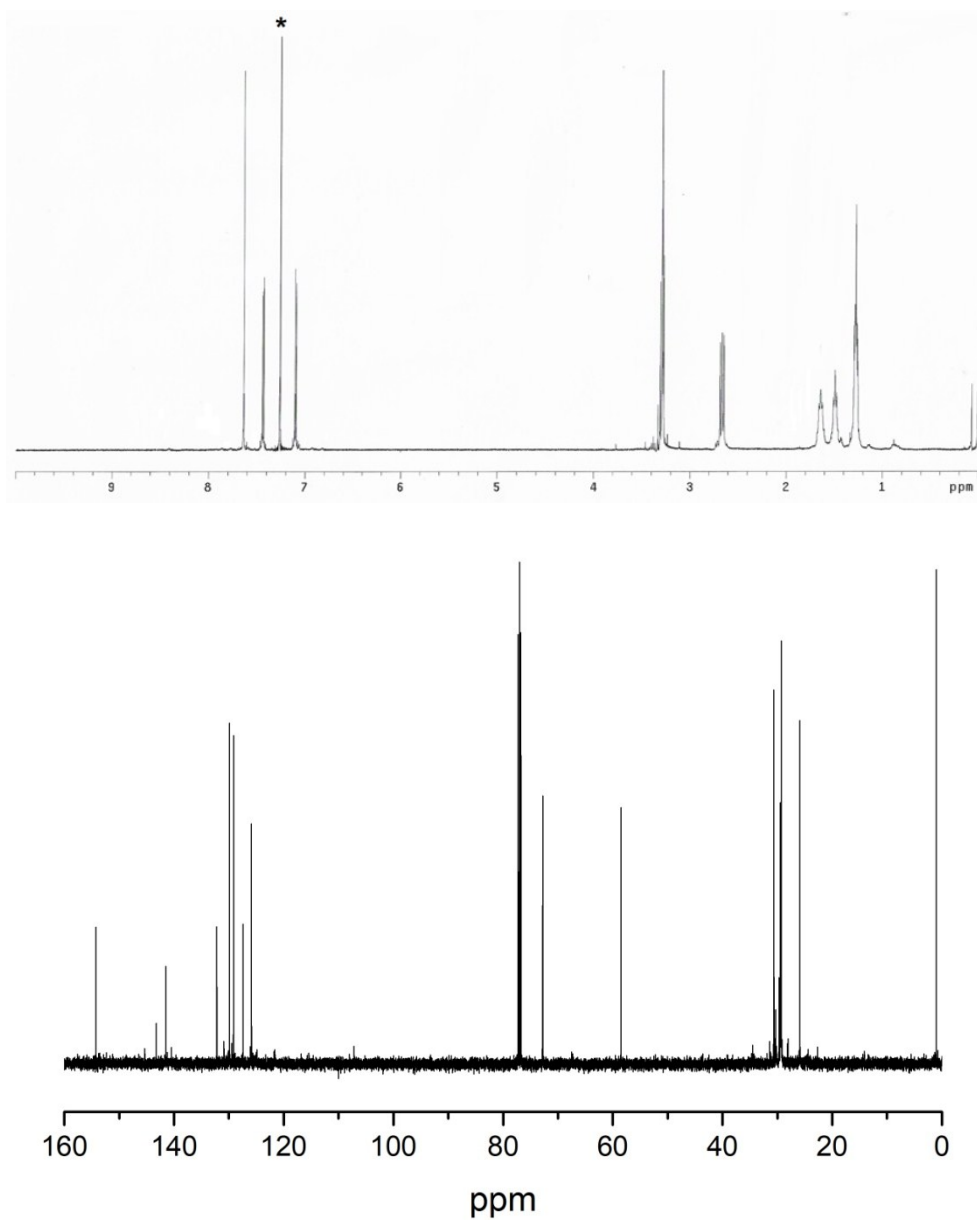

**Figure S8.**  $^1\text{H-NMR}$  and  $^{13}\text{C-NMR}$  spectra in  $\text{CDCl}_3$  of **3b**.

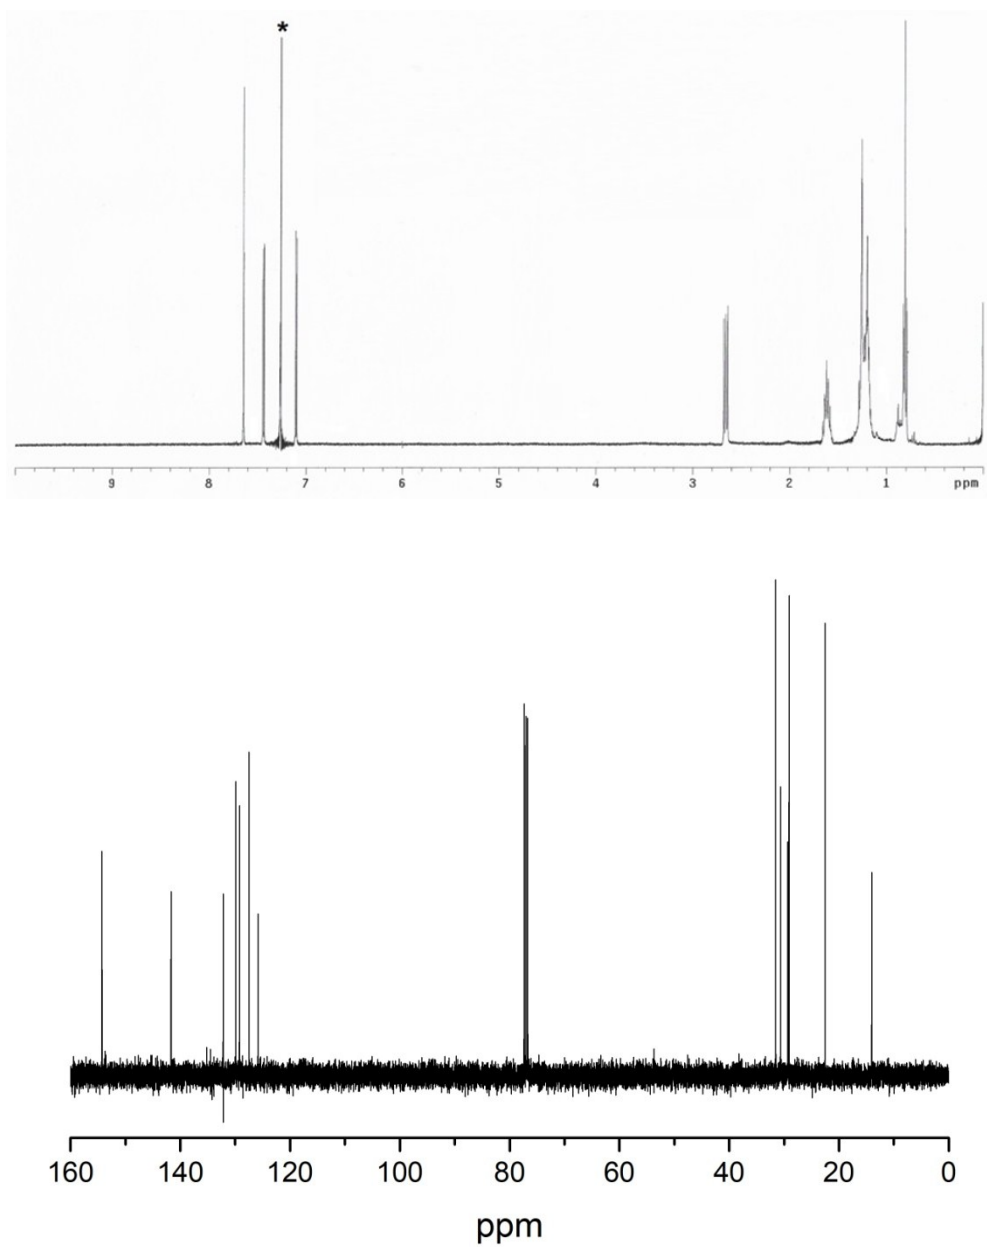

**Figure S9.** <sup>1</sup>H-NMR and <sup>13</sup>C-NMR spectra in CDCl<sub>3</sub> of **3c**.



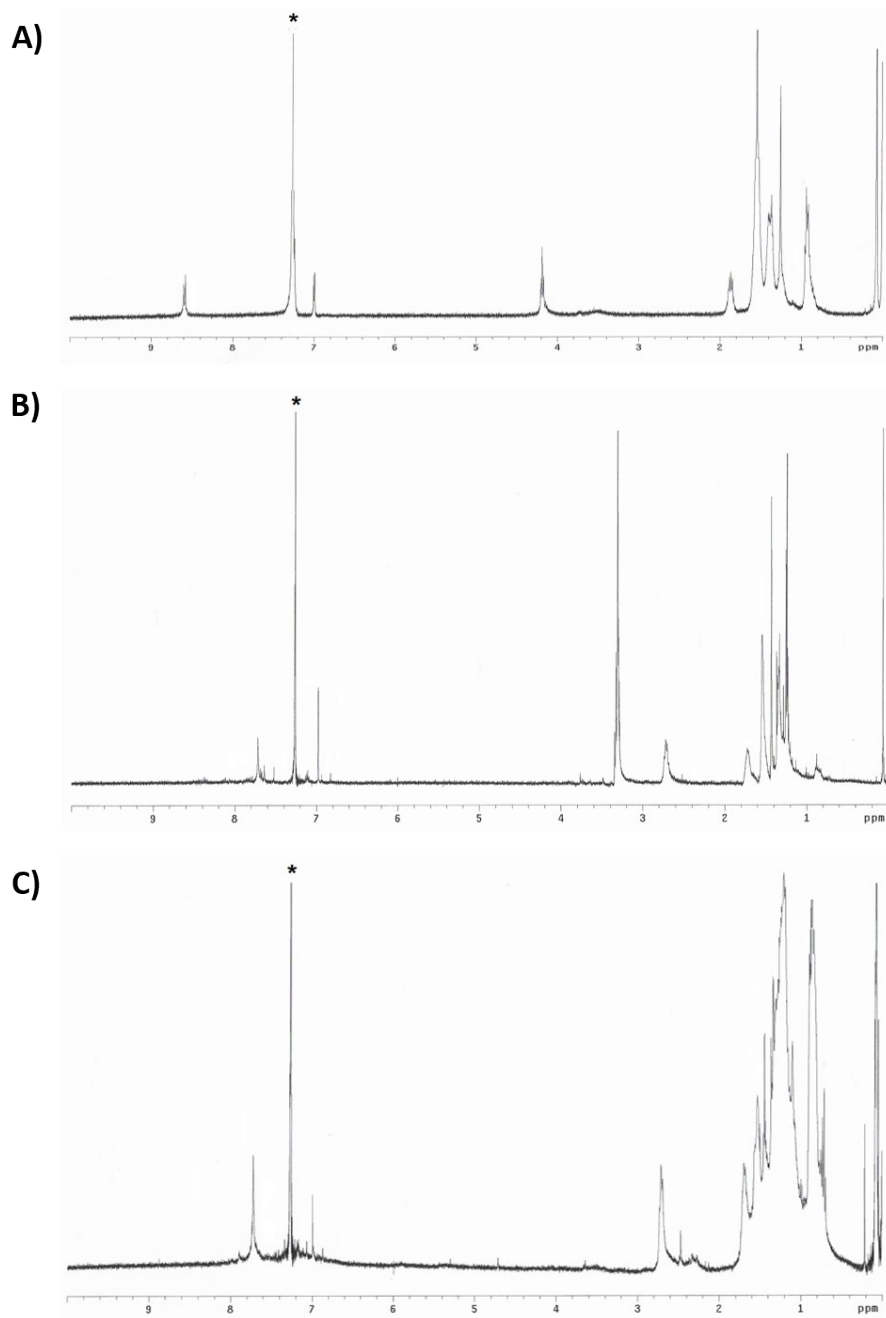

**Figure S10.** <sup>1</sup>H-NMR spectra in CDCl<sub>3</sub> of **P3a** (A), **P3b** (B) and **P3c** (C).

#### IV. Thermal properties

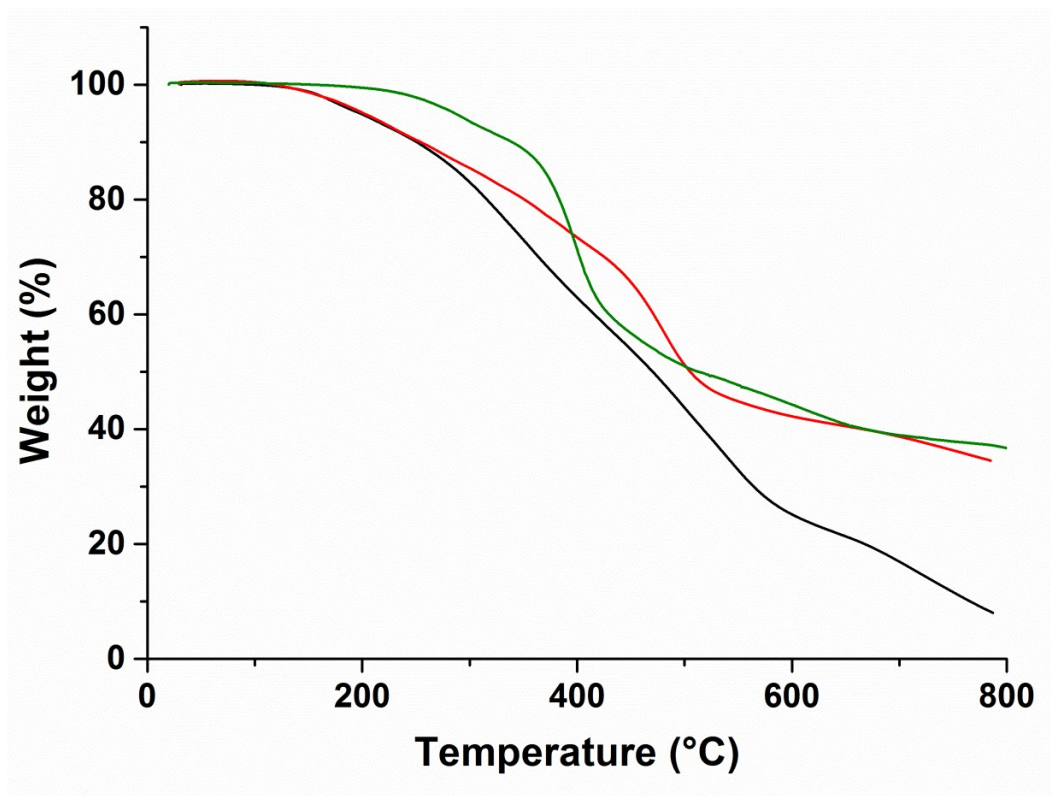

Figure S11. TGA of P3a (green line), P3b (red line) and P3c (black line).

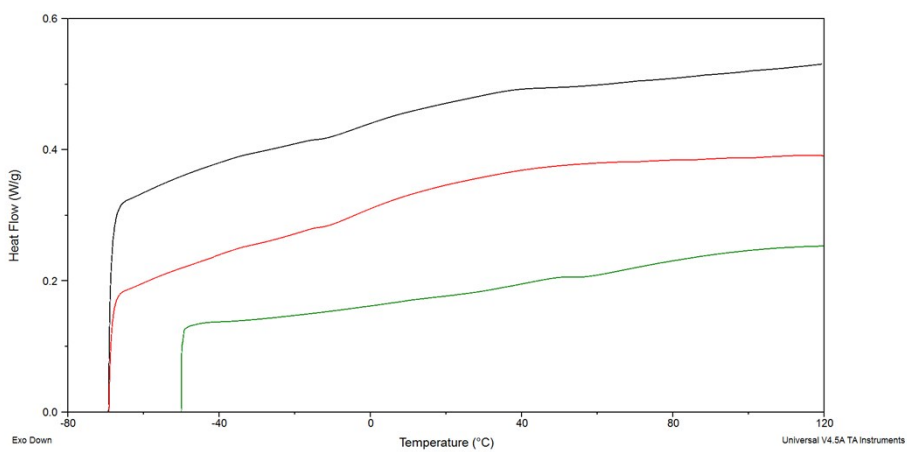

Figure S12. DSC of P3a (green line), P3b (red line) and P3c (black line)

## V. Optical properties

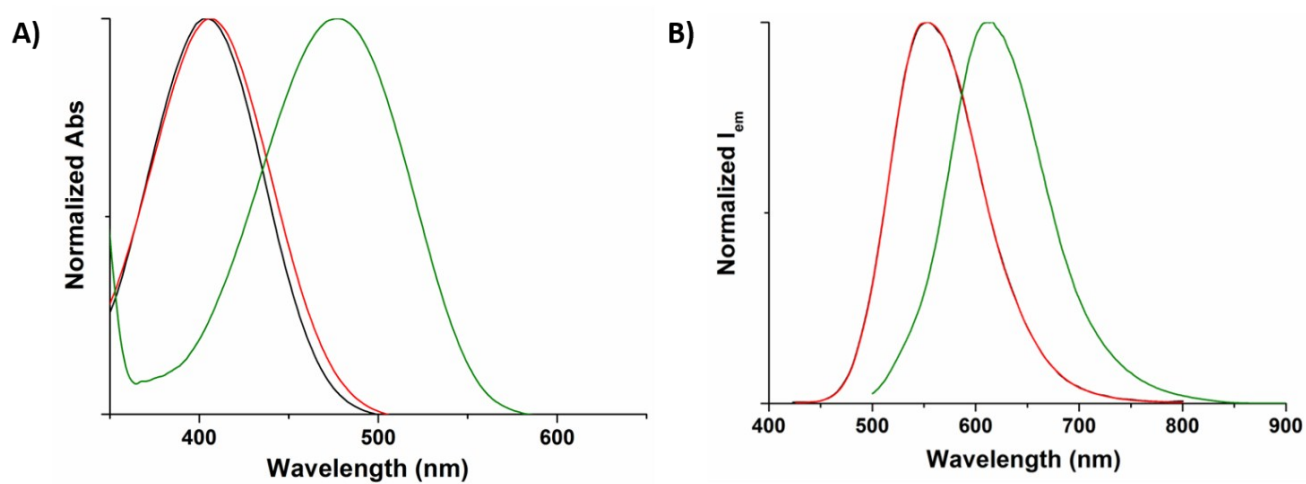

**Figure S13.** Normalized absorption (A) and photoluminescence (B) spectra in  $\text{CHCl}_3$  of monomers **3a-c** (green full line: 3a; red full line: 3b; black full line: 3c).

## VI. X-Ray diffraction and reflectivity

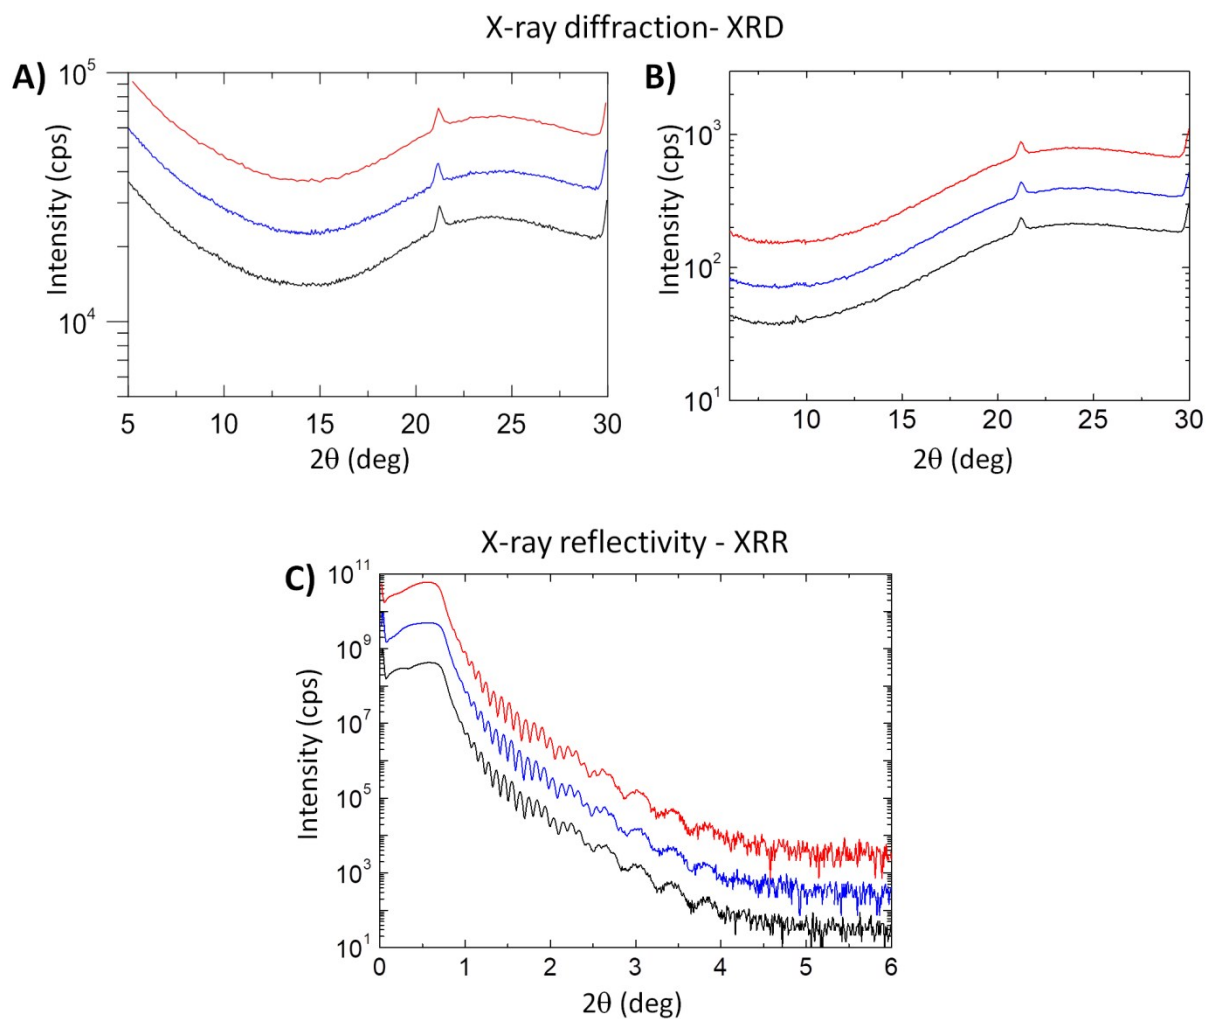

**Figure S14.** X-ray diffraction of thin films of **P3a** (red full line), **P3b** (blue full line) and **P3c** (black full line) deposited on ITO by doctor blade (A) and spray coating (B) from chlorobenzene. X-ray reflectivity of thin films of **P3a** (red full line), **P3b** (blue full line) and **P3c** (black full line) deposited on ITO by spray coating from chlorobenzene (C).
